# Supplementary material
Source: Elsevier journal article supplement (https://www.sciencedirect.com/science/article/pii/S2529984018300302)
Supplement: mmc1 [file S2529984018300302:mmc1.docx]

**Nº CASO**: **Edad**: **Sexo**: □Hombre □Mujer

**Peso:**  **Talla:**

**1**

**IMPLANTACIÓN CVC Fecha:**

**Anticoagulación**: □No □Sí: tipo

**Punción guiada por eco**: □Si □No

**Uso anestesia local:** □No □ Sí: tipo □ Mepivacaína □Cloretilo

**Lugar de inserción CVC**: □Humeral □Yugular □Subclavia □Femoral

**Centímetros implantados: Centímetros externos:**

**Tipo de fijación del CVC**: □Sutura □ Sistema adhesivo

***Durante la inserción*, paciente:** □Consciente □Inconsciente

**Escala Dolor EVA *al fijar* el CVC**: Del 1 al 10 □No valorable

**Paciente encamado:** □Sí □No

**Punción accidental del operador *al fijar* el CVC:** □No □Si

**2**

**DURANTE LA PERMANENCIA DEL CVC: Presencia de signos locales de infección (enrojecimiento, tumefacción, dolor, exudado…) en**: □ Punto punción □ Puntos de sutura □Ambos

**Desplazamiento/Migración del CVC:** □No □Sí: centímetros .......... Fecha………

**3**

**RETIRADA CVC Fecha: Duración total del CVC (días)**

**Motivo retirada:** 1. Fin de tratamiento 2. *Retirada accidental* del CVC 3. *Infección* de los puntos de sutura 4. *Infección* del punto de inserción 5. *Fiebre* de origen desconocido 6. *Hemorragia* pericatéter incontrolable 7. *Flebitis* 8. *Otras*:………………………………………………..

**Integridad cutánea** tras retirar apósito adhesivo:

0. Ausencia de lesión 1. Enrojecimiento 2. Enrojecimiento + ampolla 3. Úlcera

Al retirar el CVC medir los centímetros fuera desde punto de inserción hasta la fijación

**PARTE TRASERA DE LA HOJA SE ESPECIFICARÁ EL Nº DE CAMBIOS DE APÓSITO Y EL MOTIVO**

**Motivo del cambio de apósito:**

| Día cambio apósito | **Motivo del cambio**** | uso de hemostático | Estado punto punción | Estado de puntos sutura | Centímetros externos de CVC |
| --- | --- | --- | --- | --- | --- |
|  |  |  |  |  |  |
|  |  |  |  |  |  |
|  |  |  |  |  |  |
|  |  |  |  |  |  |
|  |  |  |  |  |  |
|  |  |  |  |  |  |
|  |  |  |  |  |  |
|  |  |  |  |  |  |
|  |  |  |  |  |  |
|  |  |  |  |  |  |
|  |  |  |  |  |  |
|  |  |  |  |  |  |
|  |  |  |  |  |  |
|  |  |  |  |  |  |
|  |  |  |  |  |  |

****Motivo del cambio de apósito:**

1. Por protocolo (cambio a los 7 días)
2. Manchado con sangre (hemorragia punto de punción - sutura)
3. Pérdida adherencia (apósito despegado)

4. Recolocación del CVC tras Rx. tórax
